# Supplementary material for: Previous Interspecific Courtship Impairs Female Receptivity to Conspecifics in the Parasitoid Wasp Nasonia longicornis But Not in N. vitripennis
Source: MDPI journal article supplement (doi:10.3390/insects9030112), 2018-09-01
Supplement: s1 [file s1]

# Mair et al. \_raw data

## Previous interspecific courtship impairs female receptivity to conspecifics in the parasitoid wasp *Nasonia longicornis* but not in *N. vitripennis*

Magdalena M. Mair, Nicole Seifert and Joachim Ruther

Institute of Zoology, University of Regensburg, Universitätsstraße 31, Regensburg D-93053, Germany

Author for correspondence: J. Ruther, e-mail: joachim.ruther @ur.de

| FID | ID      | treatment  | female.sp | het.courtship | aggression | mated.consp | court.duration(s) |
|-----|---------|------------|-----------|---------------|------------|-------------|-------------------|
| 1   | NvNv_01 | Nv.without | Nv        | no            | no         | yes         | 24                |
| 2   | NINI_01 | Nl.without | Nl        | no            | no         | yes         | 29                |
| 3   | NvNI_01 | Nv.courted | Nv        | yes           | no         | yes         | 50                |
| 4   | NINv_01 | Nl.courted | Nl        | yes           | yes        | yes         | 164               |
| 5   | NvNv_02 | Nv.without | Nv        | no            | no         | yes         | 30                |
| 6   | NINI_02 | Nl.without | Nl        | no            | no         | yes         | 35                |
| 7   | NvNI_02 | Nv.courted | Nv        | yes           | no         | yes         | 232               |
| 8   | NINv_02 | Nl.courted | Nl        | yes           | no         | yes         | 35                |
| 9   | NvNv_03 | Nv.without | Nv        | no            | no         | yes         | 13                |
| 10  | NINI_03 | Nl.without | Nl        | no            | no         | yes         | 154               |
| 11  | NvNI_03 | Nv.courted | Nv        | yes           | no         | no          | NA                |
| 12  | NINv_03 | Nl.courted | Nl        | yes           | no         | yes         | 97                |
| 13  | NvNv_04 | Nv.without | Nv        | no            | no         | yes         | 21                |
| 14  | NINI_04 | Nl.without | Nl        | no            | no         | yes         | 30                |
| 15  | NvNI_04 | Nv.courted | Nv        | yes           | no         | yes         | 22                |
| 16  | NINv_04 | Nl.courted | Nl        | yes           | yes        | yes         | 34                |
| 17  | NvNv_05 | Nv.without | Nv        | no            | no         | yes         | 58                |
| 18  | NINI_05 | Nl.without | Nl        | no            | no         | yes         | 40                |
| 19  | NvNI_05 | Nv.courted | Nv        | yes           | no         | yes         | 110               |
| 20  | NINv_05 | Nl.courted | Nl        | yes           | yes        | no          | NA                |
| 21  | NvNv_06 | Nv.without | Nv        | no            | no         | yes         | 41                |
| 22  | NINI_06 | Nl.without | Nl        | no            | no         | yes         | 10                |
| 23  | NvNI_06 | Nv.courted | Nv        | yes           | no         | yes         | 16                |
| 24  | NINv_06 | Nl.courted | Nl        | yes           | yes        | yes         | 180               |
| 25  | NvNv_07 | Nv.without | Nv        | no            | no         | yes         | 28                |
| 26  | NINI_07 | Nl.without | Nl        | no            | no         | yes         | 23                |
| 27  | NvNI_07 | Nv.courted | Nv        | yes           | no         | no          | NA                |
| 28  | NINv_07 | Nl.courted | Nl        | yes           | no         | yes         | 66                |
| 29  | NvNv_08 | Nv.without | Nv        | no            | no         | yes         | 28                |
| 30  | NINI_08 | Nl.without | Nl        | no            | no         | yes         | 44                |
| 31  | NvNI_08 | Nv.courted | Nv        | yes           | no         | yes         | 118               |
| 32  | NINv_08 | Nl.courted | Nl        | yes           | no         | yes         | 176               |
| 33  | NvNv_09 | Nv.without | Nv        | no            | no         | yes         | 36                |
| 34  | NINI_09 | Nl.without | Nl        | no            | no         | yes         | 66                |
| 35  | NvNI_09 | Nv.courted | Nv        | yes           | no         | no          | NA                |
| 36  | NINv_09 | Nl.courted | Nl        | yes           | yes        | no          | NA                |
| 37  | NvNv_10 | Nv.without | Nv        | no            | no         | yes         | 57                |
| 38  | NINI_10 | Nl.without | Nl        | no            | no         | no          | NA                |
| 39  | NvNI_10 | Nv.courted | Nv        | yes           | no         | yes         | 65                |
| 40  | NINv_10 | Nl.courted | Nl        | yes           | yes        | yes         | 47                |
| 41  | NvNv_11 | Nv.without | Nv        | no            | no         | yes         | 94                |
| 42  | NINI_11 | Nl.without | Nl        | no            | no         | yes         | 36                |
| 43  | NvNI_11 | Nv.courted | Nv        | yes           | no         | yes         | 14                |
| 44  | NINv_11 | Nl.courted | Nl        | yes           | yes        | yes         | 45                |
| 45  | NvNv_12 | Nv.without | Nv        | no            | no         | yes         | 32                |
| 46  | NINI_12 | Nl.without | Nl        | no            | no         | no          | NA                |
| 47  | NvNI_12 | Nv.courted | Nv        | yes           | no         | yes         | 86                |
| 48  | NINv_12 | Nl.courted | Nl        | yes           | no         | yes         | 37                |
| 49  | NvNv_13 | Nv.without | Nv        | no            | no         | yes         | 29                |

## Mair et al. \_raw data

|     |         |            |    |     |     |     |     |
|-----|---------|------------|----|-----|-----|-----|-----|
| 50  | NINI_13 | NI.without | NI | no  | no  | yes | 80  |
| 51  | NvNI_13 | Nv.courted | Nv | yes | no  | yes | 21  |
| 52  | NINv_13 | NI.courted | NI | yes | no  | no  | NA  |
| 53  | NvNv_14 | Nv.without | Nv | no  | no  | yes | 24  |
| 54  | NINI_14 | NI.without | NI | no  | no  | yes | 233 |
| 55  | NvNI_14 | Nv.courted | Nv | yes | no  | no  | NA  |
| 56  | NINv_14 | NI.courted | NI | yes | no  | no  | NA  |
| 57  | NvNv_15 | Nv.without | Nv | no  | no  | yes | 29  |
| 58  | NINI_15 | NI.without | NI | no  | no  | yes | 40  |
| 59  | NvNI_15 | Nv.courted | Nv | yes | no  | yes | 60  |
| 60  | NINv_15 | NI.courted | NI | yes | no  | yes | 53  |
| 61  | NvNv_16 | Nv.without | Nv | no  | no  | yes | 136 |
| 62  | NINI_16 | NI.without | NI | no  | no  | yes | 40  |
| 63  | NvNI_16 | Nv.courted | Nv | yes | no  | yes | 35  |
| 64  | NINv_16 | NI.courted | NI | yes | yes | yes | 48  |
| 65  | NvNv_17 | Nv.without | Nv | no  | no  | yes | 49  |
| 66  | NINI_17 | NI.without | NI | no  | no  | yes | 37  |
| 67  | NvNI_17 | Nv.courted | Nv | yes | no  | yes | 62  |
| 68  | NINv_17 | NI.courted | NI | yes | no  | yes | 89  |
| 69  | NvNv_18 | Nv.without | Nv | no  | no  | yes | 42  |
| 70  | NINI_18 | NI.without | NI | no  | no  | yes | 37  |
| 71  | NvNI_18 | Nv.courted | Nv | yes | no  | yes | 58  |
| 72  | NINv_18 | NI.courted | NI | yes | no  | yes | 56  |
| 73  | NvNv_19 | Nv.without | Nv | no  | no  | yes | 76  |
| 74  | NINI_19 | NI.without | NI | no  | no  | yes | 20  |
| 75  | NvNI_19 | Nv.courted | Nv | yes | no  | yes | 13  |
| 76  | NINv_19 | NI.courted | NI | yes | yes | yes | 61  |
| 77  | NvNv_20 | Nv.without | Nv | no  | no  | no  | NA  |
| 78  | NINI_20 | NI.without | NI | no  | no  | yes | 56  |
| 79  | NvNI_20 | Nv.courted | Nv | yes | no  | yes | 54  |
| 80  | NINv_20 | NI.courted | NI | yes | no  | yes | 70  |
| 81  | NvNv_21 | Nv.without | Nv | no  | no  | yes | 285 |
| 82  | NINI_21 | NI.without | NI | no  | no  | yes | 46  |
| 83  | NvNI_21 | Nv.courted | Nv | yes | no  | yes | 60  |
| 84  | NINv_21 | NI.courted | NI | yes | yes | yes | 69  |
| 85  | NvNv_22 | Nv.without | Nv | no  | no  | yes | 39  |
| 86  | NINI_22 | NI.without | NI | no  | no  | yes | 42  |
| 87  | NvNI_22 | Nv.courted | Nv | yes | no  | yes | 29  |
| 88  | NINv_22 | NI.courted | NI | yes | yes | no  | NA  |
| 89  | NvNv_23 | Nv.without | Nv | no  | no  | yes | 38  |
| 90  | NINI_23 | NI.without | NI | no  | no  | yes | 36  |
| 91  | NvNI_23 | Nv.courted | Nv | yes | no  | yes | 15  |
| 92  | NINv_23 | NI.courted | NI | yes | no  | yes | 51  |
| 93  | NvNv_24 | Nv.without | Nv | no  | no  | yes | 64  |
| 94  | NINI_24 | NI.without | NI | no  | no  | yes | 34  |
| 95  | NvNI_24 | Nv.courted | Nv | yes | no  | yes | 256 |
| 96  | NINv_24 | NI.courted | NI | yes | no  | no  | NA  |
| 97  | NvNv_25 | Nv.without | Nv | no  | no  | yes | 41  |
| 98  | NINI_25 | NI.without | NI | no  | no  | yes | 21  |
| 99  | NvNI_25 | Nv.courted | Nv | yes | no  | yes | 262 |
| 100 | NINv_25 | NI.courted | NI | yes | no  | yes | 73  |
| 101 | NvNv_26 | Nv.without | Nv | no  | no  | yes | 36  |
| 102 | NINI_26 | NI.without | NI | no  | no  | no  | NA  |
| 103 | NvNI_26 | Nv.courted | Nv | yes | no  | yes | 60  |
| 104 | NINv_26 | NI.courted | NI | yes | no  | yes | 90  |
| 105 | NvNv_27 | Nv.without | Nv | no  | no  | yes | 15  |
| 106 | NINI_27 | NI.without | NI | no  | no  | yes | 51  |
| 107 | NvNI_27 | Nv.courted | Nv | yes | no  | yes | 30  |
| 108 | NINv_27 | NI.courted | NI | yes | no  | no  | NA  |

## Mair et al. \_raw data

|     |         |            |    |     |     |     |     |
|-----|---------|------------|----|-----|-----|-----|-----|
| 109 | NvNv_28 | Nv.without | Nv | no  | no  | yes | 38  |
| 110 | NINI_28 | NI.without | NI | no  | no  | yes | 117 |
| 111 | NvNI_28 | Nv.courted | Nv | yes | no  | no  | NA  |
| 112 | NINv_28 | NI.courted | NI | yes | yes | yes | 43  |
| 113 | NvNv_29 | Nv.without | Nv | no  | no  | no  | NA  |
| 114 | NINI_29 | NI.without | NI | no  | no  | no  | 47  |
| 115 | NvNI_29 | Nv.courted | Nv | yes | no  | yes | NA  |
| 116 | NINv_29 | NI.courted | NI | yes | no  | no  | NA  |
| 117 | NvNv_30 | Nv.without | Nv | no  | no  | yes | 27  |
| 118 | NINI_30 | NI.without | NI | no  | no  | yes | 88  |
| 119 | NvNI_30 | Nv.courted | Nv | yes | no  | yes | 16  |
| 120 | NINv_30 | NI.courted | NI | yes | yes | no  | NA  |
| 121 | NvNv_31 | Nv.without | Nv | no  | no  | yes | 76  |
| 122 | NINI_31 | NI.without | NI | no  | no  | no  | NA  |
| 123 | NvNI_31 | Nv.courted | Nv | yes | no  | yes | 55  |
| 124 | NINv_31 | NI.courted | NI | yes | no  | yes | 51  |
| 125 | NvNv_32 | Nv.without | Nv | no  | no  | no  | NA  |
| 126 | NINI_32 | NI.without | NI | no  | no  | yes | 69  |
| 127 | NvNI_32 | Nv.courted | Nv | yes | no  | yes | 70  |
| 128 | NINv_32 | NI.courted | NI | yes | yes | yes | 114 |
| 129 | NvNv_33 | Nv.without | Nv | no  | no  | yes | 60  |
| 130 | NINI_33 | NI.without | NI | no  | no  | no  | NA  |
| 131 | NvNI_33 | Nv.courted | Nv | yes | no  | yes | 28  |
| 132 | NINv_33 | NI.courted | NI | yes | no  | no  | NA  |
| 133 | NvNv_34 | Nv.without | Nv | no  | no  | yes | 86  |
| 134 | NINI_34 | NI.without | NI | no  | no  | yes | 46  |
| 135 | NvNI_34 | Nv.courted | Nv | yes | no  | yes | 50  |
| 136 | NINv_34 | NI.courted | NI | yes | yes | yes | 51  |
| 137 | NvNv_35 | Nv.without | Nv | no  | no  | yes | 216 |
| 138 | NINI_35 | NI.without | NI | no  | no  | yes | 20  |
| 139 | NvNI_35 | Nv.courted | Nv | yes | no  | yes | 23  |
| 140 | NINv_35 | NI.courted | NI | yes | yes | yes | 75  |
| 141 | NvNv_36 | Nv.without | Nv | no  | no  | yes | 44  |
| 142 | NINI_36 | NI.without | NI | no  | no  | yes | 49  |
| 143 | NvNI_36 | Nv.courted | Nv | yes | no  | yes | 27  |
| 144 | NINv_36 | NI.courted | NI | yes | yes | yes | 102 |
| 145 | NvNv_37 | Nv.without | Nv | no  | no  | yes | 35  |
| 146 | NINI_37 | NI.without | NI | no  | no  | yes | 32  |
| 147 | NvNI_37 | Nv.courted | Nv | yes | no  | yes | 59  |
| 148 | NINv_37 | NI.courted | NI | yes | no  | yes | 67  |
| 149 | NvNv_38 | Nv.without | Nv | no  | no  | yes | 21  |
| 150 | NINI_38 | NI.without | NI | no  | no  | yes | 36  |
| 151 | NvNI_38 | Nv.courted | Nv | yes | no  | yes | 19  |
| 152 | NINv_38 | NI.courted | NI | yes | no  | yes | 32  |
| 153 | NvNv_39 | Nv.without | Nv | no  | no  | yes | 35  |
| 154 | NINI_39 | NI.without | NI | no  | no  | yes | 61  |
| 155 | NvNI_39 | Nv.courted | Nv | yes | no  | yes | 29  |
| 156 | NINv_39 | NI.courted | NI | yes | no  | yes | 31  |
| 157 | NvNv_40 | Nv.without | Nv | no  | no  | yes | 100 |
| 158 | NINI_40 | NI.without | NI | no  | no  | yes | 51  |
| 159 | NvNI_40 | Nv.courted | Nv | yes | no  | yes | 51  |
| 160 | NINv_40 | NI.courted | NI | yes | yes | yes | 82  |
| 161 | NvNv_41 | Nv.without | Nv | no  | no  | yes | 34  |
| 162 | NINI_41 | NI.without | NI | no  | no  | yes | 30  |
| 163 | NvNI_41 | Nv.courted | Nv | yes | no  | yes | 60  |
| 164 | NINv_41 | NI.courted | NI | yes | yes | no  | NA  |
| 165 | NvNv_42 | Nv.without | Nv | no  | no  | yes | 34  |
| 166 | NINI_42 | NI.without | NI | no  | no  | yes | 43  |
| 167 | NvNI_42 | Nv.courted | Nv | yes | no  | no  | NA  |

## Mair et al. \_raw data

|     |         |            |    |     |     |     |     |
|-----|---------|------------|----|-----|-----|-----|-----|
| 168 | NINv_42 | Nl.courted | Nl | yes | yes | no  | NA  |
| 169 | NvNv_43 | Nv.without | Nv | no  | no  | yes | 30  |
| 170 | NINI_43 | Nl.without | Nl | no  | no  | yes | 56  |
| 171 | NvNI_43 | Nv.courted | Nv | yes | no  | yes | 19  |
| 172 | NINv_43 | Nl.courted | Nl | yes | no  | yes | 76  |
| 173 | NvNv_44 | Nv.without | Nv | no  | no  | yes | 26  |
| 174 | NINI_44 | Nl.without | Nl | no  | no  | yes | 50  |
| 175 | NvNI_44 | Nv.courted | Nv | yes | no  | yes | 37  |
| 176 | NINv_44 | Nl.courted | Nl | yes | yes | yes | 42  |
| 177 | NvNv_45 | Nv.without | Nv | no  | no  | yes | 25  |
| 178 | NINI_45 | Nl.without | Nl | no  | no  | yes | 52  |
| 179 | NvNI_45 | Nv.courted | Nv | yes | no  | yes | 31  |
| 180 | NINv_45 | Nl.courted | Nl | yes | no  | yes | 146 |
| 181 | NvNv_46 | Nv.without | Nv | no  | no  | yes | 56  |
| 182 | NINI_46 | Nl.without | Nl | no  | no  | yes | 44  |
| 183 | NvNI_46 | Nv.courted | Nv | yes | no  | yes | 56  |
| 184 | NINv_46 | Nl.courted | Nl | yes | yes | yes | 53  |
| 185 | NvNv_47 | Nv.without | Nv | no  | no  | yes | 48  |
| 186 | NINI_47 | Nl.without | Nl | no  | no  | yes | 28  |
| 187 | NvNI_47 | Nv.courted | Nv | yes | no  | yes | 132 |
| 188 | NINv_47 | Nl.courted | Nl | yes | yes | yes | 133 |
| 189 | NvNv_48 | Nv.without | Nv | no  | no  | yes | 52  |
| 190 | NINI_48 | Nl.without | Nl | no  | no  | yes | 45  |
| 191 | NvNI_48 | Nv.courted | Nv | yes | no  | yes | 25  |
| 192 | NINv_48 | Nl.courted | Nl | yes | no  | no  | NA  |
| 193 | NvNv_49 | Nv.without | Nv | no  | no  | yes | 24  |
| 194 | NINI_49 | Nl.without | Nl | no  | no  | yes | 48  |
| 195 | NvNI_49 | Nv.courted | Nv | yes | no  | yes | 57  |
| 196 | NINv_49 | Nl.courted | Nl | yes | yes | yes | 60  |
| 197 | NvNv_50 | Nv.without | Nv | no  | no  | yes | 37  |
| 198 | NINI_50 | Nl.without | Nl | no  | no  | yes | 16  |
| 199 | NvNI_50 | Nv.courted | Nv | yes | no  | no  | NA  |
| 200 | NINv_50 | Nl.courted | Nl | yes | yes | no  | NA  |
| 201 | NvNv_51 | Nv.without | Nv | no  | no  | yes | 53  |
| 202 | NINI_51 | Nl.without | Nl | no  | no  | yes | 40  |
| 203 | NvNI_51 | Nv.courted | Nv | yes | no  | yes | 60  |
| 204 | NINv_51 | Nl.courted | Nl | yes | no  | yes | 50  |
| 205 | NvNv_52 | Nv.without | Nv | no  | no  | yes | 62  |
| 206 | NINI_52 | Nl.without | Nl | no  | no  | yes | 27  |
| 207 | NvNI_52 | Nv.courted | Nv | yes | no  | no  | NA  |
| 208 | NINv_52 | Nl.courted | Nl | yes | no  | yes | 39  |
| 209 | NvNv_53 | Nv.without | Nv | no  | no  | yes | 33  |
| 210 | NINI_53 | Nl.without | Nl | no  | no  | yes | 48  |
| 211 | NvNI_53 | Nv.courted | Nv | yes | no  | yes | 45  |
| 212 | NINv_53 | Nl.courted | Nl | yes | yes | no  | NA  |
| 213 | NvNv_54 | Nv.without | Nv | no  | yes | no  | NA  |
| 214 | NINI_54 | Nl.without | Nl | no  | no  | no  | NA  |
| 215 | NvNI_54 | Nv.courted | Nv | yes | no  | yes | 155 |
| 216 | NINv_54 | Nl.courted | Nl | yes | no  | yes | 255 |
| 217 | NvNv_55 | Nv.without | Nv | no  | no  | yes | 28  |
| 218 | NINI_55 | Nl.without | Nl | no  | no  | no  | NA  |
| 219 | NvNI_55 | Nv.courted | Nv | yes | no  | yes | 12  |
| 220 | NINv_55 | Nl.courted | Nl | yes | no  | no  | NA  |
| 221 | NvNv_56 | Nv.without | Nv | no  | no  | yes | 32  |
| 222 | NINI_56 | Nl.without | Nl | no  | no  | no  | NA  |
| 223 | NvNI_56 | Nv.courted | Nv | yes | no  | yes | 83  |
| 224 | NINv_56 | Nl.courted | Nl | yes | yes | no  | NA  |
| 225 | NvNv_57 | Nv.without | Nv | no  | no  | yes | 254 |
| 226 | NINI_57 | Nl.without | Nl | no  | no  | yes | 39  |

## Mair et al. \_raw data

|     |         |            |    |     |     |     |     |
|-----|---------|------------|----|-----|-----|-----|-----|
| 227 | NvNI_57 | Nv.courted | Nv | yes | no  | yes | 30  |
| 228 | NINv_57 | NI.courted | NI | yes | yes | no  | NA  |
| 229 | NvNv_58 | Nv.without | Nv | no  | no  | yes | 62  |
| 230 | NINI_58 | NI.without | NI | no  | no  | yes | 86  |
| 231 | NvNI_58 | Nv.courted | Nv | yes | no  | yes | 19  |
| 232 | NINv_58 | NI.courted | NI | yes | no  | no  | NA  |
| 233 | NvNv_59 | Nv.without | Nv | no  | no  | no  | NA  |
| 234 | NINI_59 | NI.without | NI | no  | no  | yes | 89  |
| 235 | NvNI_59 | Nv.courted | Nv | yes | no  | no  | NA  |
| 236 | NINv_59 | NI.courted | NI | yes | yes | yes | 20  |
| 237 | NvNv_60 | Nv.without | Nv | no  | no  | no  | NA  |
| 238 | NINI_60 | NI.without | NI | no  | no  | yes | 47  |
| 239 | NvNI_60 | Nv.courted | Nv | yes | no  | yes | 39  |
| 240 | NINv_60 | NI.courted | NI | yes | no  | yes | 67  |
| 241 | NvNv_61 | Nv.without | Nv | no  | no  | yes | 21  |
| 242 | NINI_61 | NI.without | NI | no  | no  | yes | 72  |
| 243 | NvNI_61 | Nv.courted | Nv | yes | no  | yes | 28  |
| 244 | NINv_61 | NI.courted | NI | yes | no  | yes | 129 |
| 245 | NvNv_62 | Nv.without | Nv | no  | no  | yes | 41  |
| 246 | NINI_62 | NI.without | NI | no  | no  | yes | 82  |
| 247 | NvNI_62 | Nv.courted | Nv | yes | no  | yes | 62  |
| 248 | NINv_62 | NI.courted | NI | yes | no  | no  | NA  |
| 249 | NvNv_63 | Nv.without | Nv | no  | no  | yes | 66  |
| 250 | NINI_63 | NI.without | NI | no  | no  | yes | 131 |
| 251 | NvNI_63 | Nv.courted | Nv | yes | no  | yes | 31  |
| 252 | NINv_63 | NI.courted | NI | yes | no  | yes | 164 |
| 253 | NvNv_64 | Nv.without | Nv | no  | no  | yes | 83  |
| 254 | NINI_64 | NI.without | NI | no  | no  | yes | 72  |
| 255 | NvNI_64 | Nv.courted | Nv | yes | no  | yes | 48  |
| 256 | NINv_64 | NI.courted | NI | yes | no  | no  | NA  |
| 257 | NvNv_65 | Nv.without | Nv | no  | no  | yes | 46  |
| 258 | NINI_65 | NI.without | NI | no  | no  | yes | 65  |
| 259 | NvNI_65 | Nv.courted | Nv | yes | no  | yes | 126 |
| 260 | NINv_65 | NI.courted | NI | yes | no  | yes | 45  |
| 261 | NvNv_66 | Nv.without | Nv | no  | no  | no  | NA  |
| 262 | NINI_66 | NI.without | NI | no  | no  | yes | NA  |
| 263 | NvNI_66 | Nv.courted | Nv | yes | no  | yes | 18  |
| 264 | NINv_66 | NI.courted | NI | yes | no  | yes | 128 |
| 265 | NvNv_67 | Nv.without | Nv | no  | no  | yes | NA  |
| 266 | NINI_67 | NI.without | NI | no  | no  | yes | NA  |
| 267 | NvNI_67 | Nv.courted | Nv | yes | no  | yes | 68  |
| 268 | NINv_67 | NI.courted | NI | yes | no  | yes | 43  |
| 269 | NvNv_68 | Nv.without | Nv | no  | no  | yes | NA  |
| 270 | NINI_68 | NI.without | NI | no  | no  | yes | NA  |
| 271 | NvNI_68 | Nv.courted | Nv | yes | no  | yes | 75  |
| 272 | NINv_68 | NI.courted | NI | yes | yes | yes | 52  |
| 273 | NvNv_69 | Nv.without | Nv | no  | no  | yes | NA  |
| 274 | NINI_69 | NI.without | NI | no  | no  | yes | NA  |
| 275 | NvNI_69 | Nv.courted | Nv | yes | no  | yes | 141 |
| 276 | NINv_69 | NI.courted | NI | yes | no  | yes | 88  |
| 277 | NvNv_70 | Nv.without | Nv | no  | no  | yes | NA  |
| 278 | NINI_70 | NI.without | NI | no  | no  | yes | NA  |
| 279 | NvNI_70 | Nv.courted | Nv | yes | no  | yes | 38  |
| 280 | NINv_70 | NI.courted | NI | yes | yes | yes | 38  |
| 281 | NvNv_71 | Nv.without | Nv | no  | no  | yes | NA  |
| 282 | NINI_71 | NI.without | NI | no  | no  | yes | NA  |
| 283 | NvNI_71 | Nv.courted | Nv | yes | no  | yes | 50  |
| 284 | NINv_71 | NI.courted | NI | yes | no  | no  | NA  |
| 285 | NvNv_72 | Nv.without | Nv | no  | no  | yes | NA  |

Mair et al. \_raw data

|     |         |            |    |     |     |     |     |
|-----|---------|------------|----|-----|-----|-----|-----|
| 286 | NINI_72 | NI.without | NI | no  | no  | yes | NA  |
| 287 | NvNI_72 | Nv.courted | Nv | yes | no  | yes | 26  |
| 288 | NINv_72 | NI.courted | NI | yes | no  | yes | 45  |
| 289 | NvNv_73 | Nv.without | Nv | no  | no  | yes | NA  |
| 290 | NINI_73 | NI.without | NI | no  | no  | yes | NA  |
| 291 | NvNI_73 | Nv.courted | Nv | yes | no  | yes | 79  |
| 292 | NINv_73 | NI.courted | NI | yes | no  | yes | 69  |
| 293 | NvNv_74 | Nv.without | Nv | no  | no  | yes | 35  |
| 294 | NINI_74 | NI.without | NI | no  | no  | yes | NA  |
| 295 | NvNI_74 | Nv.courted | Nv | yes | no  | yes | 198 |
| 296 | NINv_74 | NI.courted | NI | yes | no  | yes | 65  |
| 297 | NvNv_75 | Nv.without | Nv | no  | no  | yes | 30  |
| 298 | NINI_75 | NI.without | NI | no  | no  | yes | NA  |
| 299 | NvNI_75 | Nv.courted | Nv | yes | no  | yes | 30  |
| 300 | NINv_75 | NI.courted | NI | yes | no  | yes | 60  |
| 301 | NvNv_76 | Nv.without | Nv | no  | no  | yes | 76  |
| 302 | NINI_76 | NI.without | NI | no  | no  | yes | 80  |
| 303 | NvNI_76 | Nv.courted | Nv | yes | no  | yes | 48  |
| 304 | NINv_76 | NI.courted | NI | yes | no  | no  | NA  |
| 305 | NvNv_77 | Nv.without | Nv | no  | no  | yes | 50  |
| 306 | NINI_77 | NI.without | NI | no  | no  | yes | 48  |
| 307 | NvNI_77 | Nv.courted | Nv | yes | no  | yes | 30  |
| 308 | NINv_77 | NI.courted | NI | yes | no  | no  | NA  |
| 309 | NvNv_78 | Nv.without | Nv | no  | no  | yes | NA  |
| 310 | NINI_78 | NI.without | NI | no  | no  | yes | 96  |
| 311 | NvNI_78 | Nv.courted | Nv | yes | no  | yes | 38  |
| 312 | NINv_78 | NI.courted | NI | yes | yes | no  | NA  |
| 313 | NvNv_79 | Nv.without | Nv | no  | no  | yes | NA  |
| 314 | NINI_79 | NI.without | NI | no  | no  | yes | 41  |
| 315 | NvNI_79 | Nv.courted | Nv | yes | no  | yes | NA  |
| 316 | NINv_79 | NI.courted | NI | yes | no  | yes | NA  |
| 317 | NvNv_80 | Nv.without | Nv | no  | no  | yes | NA  |
| 318 | NINI_80 | NI.without | NI | no  | no  | yes | NA  |
| 319 | NvNI_80 | Nv.courted | Nv | yes | no  | yes | 61  |
| 320 | NINv_80 | NI.courted | NI | yes | no  | yes | NA  |
